# Supplementary material for: Large-area potassium-doped highly conductive graphene films for electromagnetic interference shielding
Source: Royal Society of Chemistry journal article supplement (doi:10.1039/c7nr07030f), 2017-01-01
Supplement: c7nr07030f1.pdf [file c7nr07030f1.pdf]

## *Supporting Information for*

### **Large-Area Potassium-Doped Highly Conductive Graphene Films for Electromagnetic Interference Shielding**

Erzhen Zhou,<sup>‡a,b</sup> Jiabin Xi,<sup>‡a</sup> Yingjun Liu,<sup>a</sup> Zhen Xu,<sup>\*a</sup> Yan Guo,<sup>a</sup> Li Peng,<sup>a</sup> Weiwei Gao,<sup>a</sup> Ji Ying,<sup>b</sup> Zichen Chen<sup>\*b</sup> & Chao Gao<sup>\*a</sup>

<sup>a</sup> MOE Key Laboratory of Macromolecular Synthesis and Functionalization, Department of Polymer Science and Engineering, Zhejiang University, 38 Zheda Road, Hangzhou 310027, P. R. China.

<sup>b</sup> Department of Mechanical Engineering, Zhejiang University, 38 Zheda Road, Hangzhou 310027, P. R. China.

\*To whom correspondence should be addressed. E-mail: zhenxu@zju.edu.cn, chenzc@zju.edu.cn, chaogao@zju.edu.cn

‡The authors contributed equally to this paper.

**Characterizations.** Renishaw in *Via-Riflex* Raman Microscopy recorded Raman spectra at an excitation wavelength of 532 nm. To avoid laser heating effect, the laser power at sample was kept below 0.5 mW. X-ray diffraction (XRD) measurement were carried out on an X'Pert Pro diffractometer (PANalytical) using Cu K $\alpha$  radiation ( $\lambda=1.5406 \text{ \AA}$ ) with scanning speed of 6 degree  $\text{min}^{-1}$  at room temperature. To avoid the sample being oxidized, the test samples of Raman and XRD were sealed within the commercial scotch tapes. The scanning electron microscopy (SEM) images and energy dispersive spectroscopy (EDS) elemental mapping were taken on a Hitachi S4800 field-emission SEM system. The SEM samples were characterized at once after they were taken out of the glovebox.

**Electrical Performance Testing.** A four-probe method on an electrical transport properties measurement system comprising a Keithley 2400 multiple-function source-meter was used to measure the electrical transport properties. For the air and water sensitive samples, the GF-K film was tested in the glove box.

**EMI SE Testing.** SE in 2-18 GHz was tested with a modified version of the flanged coaxial sample holder. The modified sample holder is smaller in dimensions (inner diameter=3 mm, outer diameter=7 mm, flange edge diameter= 80 mm). The two sample holders are connected with a ZNB 40 vector network analyzer (Rohde & Schwarz, Germany) through a pair of 50  $\Omega$  double-shielded coaxial cables. The samples were tested immediately after taking out of the glovebox.

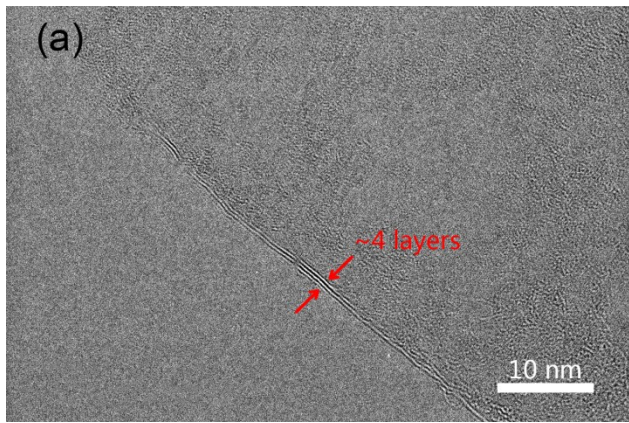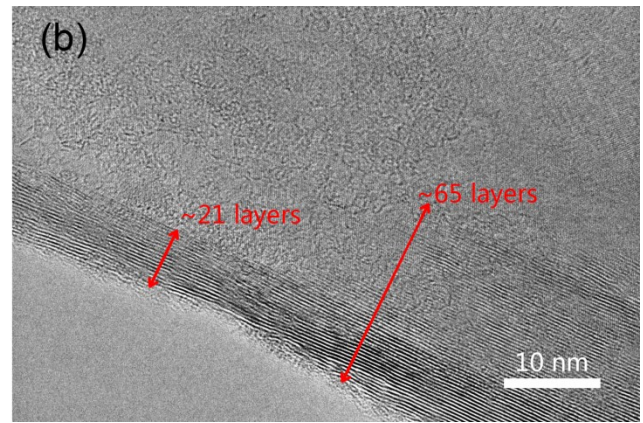

Figure S1. TEM image of GF.

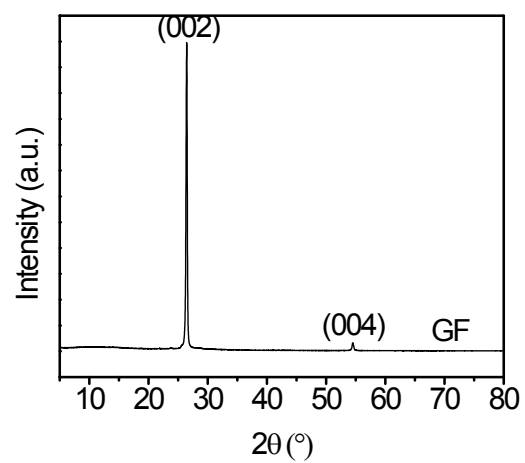

**Figure S2.** XRD pattern of GF.

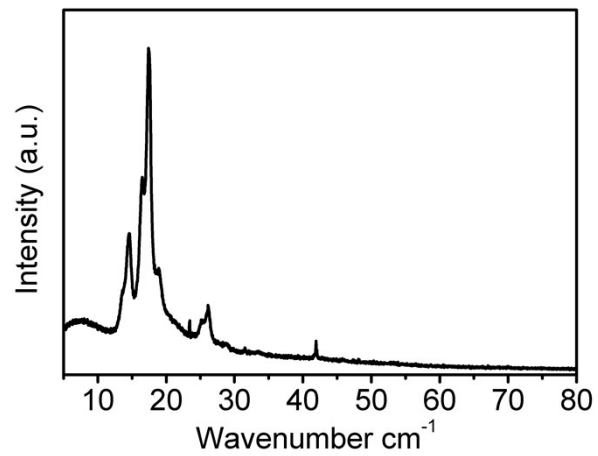

Figure S3. XRD pattern of potassium

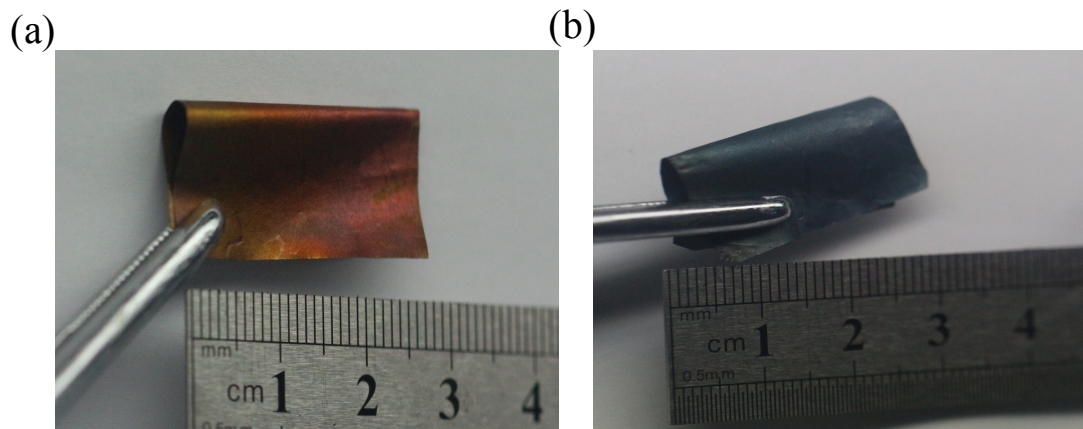

**Figure S4.** a) Photograph of the bent GF-K1 film, b) photograph of the bent GF-K2 film.

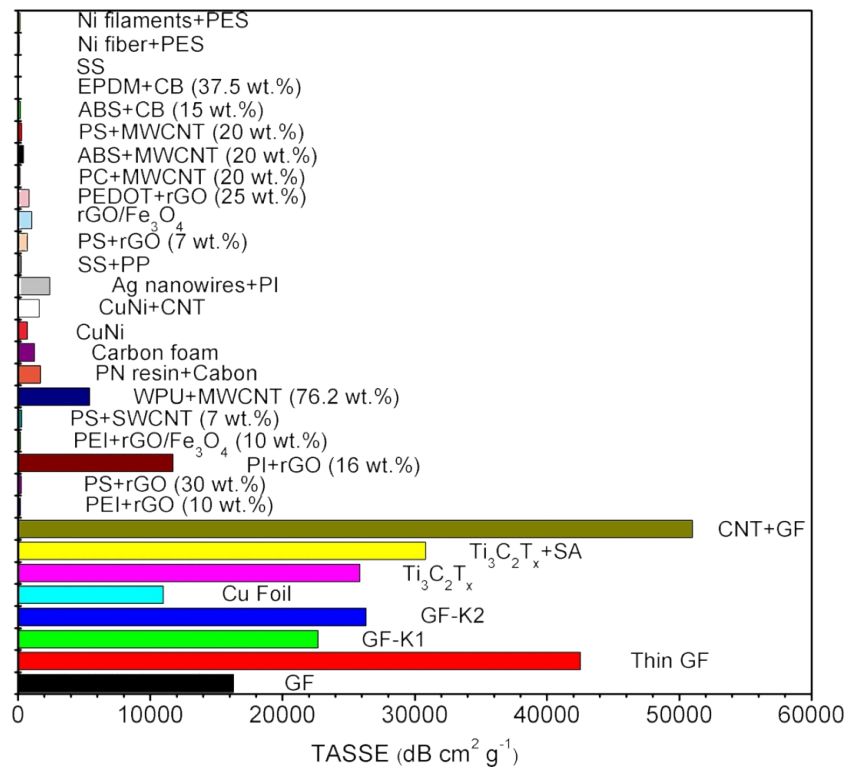

**Figure S5.** Thickness-averaged specific shielding effectiveness (TASSE) of various shielding materials.

**Table S1.** TASSE of various shielding materials.

| Type             |              | Filler                                        | Filler [wt.%]  | Matrix   | t<br>[cm] | SE<br>[dB] | SSE/t<br>[dB cm <sup>2</sup> g <sup>-1</sup> ] | Ref       |
|------------------|--------------|-----------------------------------------------|----------------|----------|-----------|------------|------------------------------------------------|-----------|
| Foam Structure   | Carbon Based | rGO                                           | 10             | PEI      | 0.23      | 12.8       | 191.3                                          | 1         |
|                  |              | rGO                                           | 30             | PS       | 0.20      | 29         | 257.6                                          | 2         |
|                  |              | rGO                                           | 16             | PI       | 0.08      | 21         | 11712                                          | 3         |
|                  |              | rGO/Fe <sub>3</sub> O <sub>4</sub>            | 10             | PEI      | 0.25      | 18         | 176                                            | 4         |
|                  |              | SWCNT                                         | 7              | PS       | 0.12      | 18.5       | 275                                            | 5         |
|                  |              | MWCNT                                         | 76.2           | WPU      | 0.1       | 21.1       | 5410                                           | 6         |
|                  |              | Carbon                                        | /              | PN resin | 0.2       | 51.2       | 1705                                           | 7         |
|                  |              | Carbon foam                                   | Bulk           | /        | 0.2       | 40         | 1250                                           | 8         |
|                  |              | GF                                            |                | CNT      | 0.08      | 23.7       | 510000                                         | 9         |
|                  | Metal        | CuNi                                          | Bulk           | /        | 0.15      | 25         | 690                                            | 10        |
|                  |              | CuNi-CNT                                      | Bulk           | /        | 0.15      | 54.6       | 1580                                           | 10        |
|                  |              | Ag nanowires                                  | 4.5            | PI       | 0.5       | 35         | 2416                                           | 11        |
| SS               |              | 1.1 <sup>#</sup>                              | PP             | 0.31     | 48        | 241.9      | 12                                             |           |
| Solid Structures | Carbon Based | rGO                                           | 7              | PS       | 0.25      | 45.1       | 692                                            | 13        |
|                  |              | rGO/Fe <sub>3</sub> O <sub>4</sub>            | Bulk           | /        | 0.03      | 24         | 1033                                           | 14        |
|                  |              | rGO                                           | 25             | PEDOT    | 0.08      | 70         | 841                                            | 15        |
|                  |              | MWCNT                                         | 20             | PC       | 0.21      | 39         | 164                                            | 16        |
|                  |              | MWCNT                                         | 15             | ABS      | 0.11      | 50         | 432.7                                          | 17        |
|                  |              | MWCNT                                         | 20             | PS       | 0.2       | 30         | 285                                            | 6         |
|                  |              | CB                                            | 15             | ABS      | 0.11      | 20         | 190                                            | 17        |
|                  |              | CB                                            | 37.5           | EPDM     | 0.2       | 18         | 15.1                                           | 18        |
|                  | Metal        | SS                                            | Bulk           | /        | 0.4       | 89         | 27.5                                           | 19        |
|                  |              | Ni fiber                                      | 7 <sup>#</sup> | PES      | 0.285     | 58         | 108.7                                          | 19        |
|                  |              | Ni filaments                                  | 7 <sup>#</sup> | PES      | 0.285     | 87         | 164.9                                          | 19        |
|                  |              | Cu Foil                                       | Bulk           | /        | 0.0013    | 127        | 10976.7                                        | This work |
|                  | MXene        | Ti <sub>3</sub> C <sub>2</sub> T <sub>x</sub> | Bulk           | /        | 0.0011    | 68         | 25863                                          | 20        |
|                  |              | Ti <sub>3</sub> C <sub>2</sub> T <sub>x</sub> | 90             | SA       | 0.0008    | 57         | 30830                                          |           |
|                  | GF-K         | GF-K1                                         | Bulk           | /        | 0.0038    | >125       | >22686                                         | This work |
|                  |              | GF-K2                                         | Bulk           | /        | 0.0031    | >130       | >26321                                         |           |
|                  | GF           | GF                                            | Bulk           | /        | 0.0027    | 74         | 15572.4                                        |           |
|                  |              | Thin GF                                       | Bulk           | /        | 0.0012    | 50         | 42500                                          |           |

Notes: / indicates that the values were either not available or impossible to calculate; # -Vol. %; SS – Stainless steel; Bulk - 100% pure material with no polymeric binder; Thin GF shows a better TASSE.



### **The choice of the standard frequency, thickness and areal density in VASE and WASE**

When evaluating VASE and WASE with Simon formula, the error is inevitable since the structural information is not included in this equation. To limit the error in calculation, the frequency and thickness should be closed to the test values. In the existing EMI shielding researches, most tested the shielding performance in 2-18 GHz by coaxial line system or 8-12 GHz by waveguide system, so 10 GHz is always the median in these two frequency bands. That's why 10 GHz is used as a standard frequency.

For the thickness selection, we classified the former reports into two categories: conductive films and polymer-based composites. In the former case, the tested thickness is several micrometers while the tested thickness of composites always approaches 1 millimeter. However, when we select a thickness more than 10  $\mu\text{m}$ , the VASE and WASE will be so high that far beyond the test limits of commercial test machines (130 dB for our case). Therefore, we chose 10  $\mu\text{m}$  as the standard thickness for VASE, and  $8.9 \times 10^{-2} \text{ g cm}^{-2}$  (10  $\mu\text{m}$  for copper) as the standard areal density for WASE.

## The calculation of VASE and WASE

VASE is defined as EMI SE at 10  $\mu\text{m}$  thickness, and WASE is defined as EMI SE at the areal density of  $8.9 \times 10^{-3} \text{ g cm}^{-2}$ , that is the SE at the thickness of  $(89/\rho) \mu\text{m}$ , where  $\rho(\text{g cm}^{-3})$  is the density of the shielding material.

The deduction of VASE and WASE was based on Simon formula in the text:

$$SE = 90 + 0.017 \times d\sqrt{f\sigma} + 10\log_{10}\left(\frac{\sigma}{f}\right) = f(d, f, \sigma) \quad (\text{S1})$$

When a serie of data including tested frequency (f), shielding effectiveness (SE), thickness (d) and density ( $\rho$ ) in known, the value of  $\sigma$  could be obtained by calculating the inverse function of Simon equation:

$$\sigma_s = f^{-1}(d, f, SE) \quad (\text{S2})$$

Typically, the obtained conductivity  $\sigma_s$  is not accurately the conductivity of the material. For the materials with specific structure,  $\sigma_s$  is the conductivity containing the structure information, and it directly correlates with EMI shielding performance, so we name it as “specific conductivity”.

After that, VASE and WASE can be obtained:

$$VASE = f(10 \mu\text{m}, 10 \text{ GHz}, \sigma_s) \quad (\text{S3})$$

$$WASE = f\left(\frac{89}{\rho} \mu\text{m}, 10 \text{ GHz}, \sigma_s\right) \quad (\text{S4})$$

Since Simon formula itself is not accurate when evaluating lowly conductive materials, the VASE and WASE values we give in the tables and figures are not calculated by equation (S1). The actual formula we use is equation (S5), the pre-simplified form of Simon formula:

$$SE = 20 \log_{10} \frac{2\sqrt{\mu_0/\varepsilon_0} \cdot \sqrt{i \cdot 2\pi\mu_0 f / \sigma}}{\left(\frac{\mu_0}{\varepsilon_0} + i \cdot \frac{2\pi\mu_0 f}{\sigma}\right) \cdot \sinh(\sqrt{i \cdot 2\pi\mu_0 f} \cdot d) + \left(2 \sqrt{\frac{\mu_0}{\varepsilon_0}} \cdot \sqrt{i \cdot \frac{2\pi\mu_0 f}{\sigma}}\right) \cdot \cosh(\sqrt{i \cdot 2\pi\mu_0 f} \cdot d)} = f(d, f, \sigma) \quad (S5)$$

Where  $\varepsilon_0$  is vacuum permittivity,  $\mu_0$  is vacuum permeability,  $i$  is imaginary units. The rest of the steps are the same as described above.

## References

- 1 J. Ling, W. Zhai, W. Feng, B. Shen, J. Zhang and W. Zheng, *ACS Appl. Mater. Inter.*, 2013, **5**, 2677-2684.
- 2 D. Yan, P. Ren, H. Pang, Q. Fu, M. Yang and Z. Li, *J. Mater. Chem.*, 2012, **22**, 18772-18774.
- 3 Y. Li, X. Pei, B. Shen, W. Zhai, L. Zhang and W. Zheng, *RSC Adv.*, 2015, **5**, 24342-24351.
- 4 B. Shen, W. Zhai, M. Tao, J. Ling and W. Zheng, *ACS Appl. Mater. Inter.*, 2013, **5**, 11383-11391.
- 5 Y. Yang and M. Gupta, *Nano Lett.*, 2005, **11**, 2131-2134.
- 6 M. Arjmand, T. Apperley, M. Okoniewski and U. Sundararaj, *Carbon*, 2012, **50**, 5126-5134.
- 7 L. Zhang, M. Liu, S. Roy, E. Chu, K. See and X. Hu, *ACS Appl. Mater. Inter.*, 2016, **8**, 7422-7430.
- 8 F. Moglie, D. Micheli, S. Laurenzi, M. Marchetti and V. Mariani Primiani, *Carbon*, 2012, **50**, 1972-1980.
- 9 Q. Song, F. Ye, X. Yin, W. Li, H. Li, Y. Liu, K. Li, K. Xie, X. Li, Q. Fu, L. Cheng, L. Zhang and B. Wei, *Adv. Mater.*, 2017, 1701583.
- 10 K. Ji, H. Zhao, J. Zhang, J. Chen and Z. Dai, *Appl. Surf. Sci.*, 2014, **311**, 351-356.
- 11 J. Ma, K. Wang and M. Zhan, *RSC Adv.*, 2015, **5**, 65283-65296.
- 12 A. Ameli, M. Nofar, S. Wang and C. B. Park, *ACS Appl. Mater. Inter.*, 2014, **6**, 11091-11100.
- 13 D. X. Yan, H. Pang, B. Li, R. Vajtai, L. Xu, P. G. Ren, J. H. Wang and Z. M. Li, *Adv. Funct. Mater.*, 2015, **25**, 559-566.
- 14 W. L. Song, X. T. Guan, L. Z. Fan, W. Q. Cao, C. Y. Wang, Q. L. Zhao and M. S. Cao, *J. Mater. Chem. A.*, 2015, **3**, 2097-2107.
- 15 N. Agnihotri, K. Chakrabarti and A. De, *RSC Adv.*, 2015, **5**, 43765-43771.

- 16 S. Pande, A. Chaudhary, D. Patel, B. P. Singh and R. B. Mathur, *RSC Adv.*, 2014, **4**, 13839-13849.
- 17 M. H. A. Saleh, W. H. Saadeh and U. Sundararaj, *Carbon*, 2013, **60**, 146-156.
- 18 P. Ghosh and A. Chakrabarti, *Eur. Polym. J.*, 2000, **36**, 1043-1054.
- 19 X. P. Shui and D. D. L. Chung, *J. Electron. Mater.*, 1997, **8**, 928-934.
- 20 F. Shahzad, M. Alhabeab, C. B. Hatter, B. Anasori, S. Man Hong, C. M. Koo and Y. Gogotsi, *Science*, 2016, **353**, 1137-1140.
